# Supplementary material for: Guest-selective and reversible magnetic phase switching in a pseudo-pillared-layer porous magnet
Source: Royal Society of Chemistry journal article supplement (doi:10.1039/d1cc01526e), 2021-01-01
Supplement: d1cc01526e1.pdf [file d1cc01526e1.pdf]

## Supplementary Information

### Guest-Selective and Reversible Magnetic Phase Switching in a Pseudo-Pillared-Layer Porous Magnet

Haruka Yoshino,<sup>a</sup> Narumi Tomokage,<sup>a</sup> Akio Mishima,<sup>a</sup> Benjamin Le Ouay,<sup>a</sup> Ryo Ohtani,<sup>a</sup>  
Wataru Kosaka,<sup>bc</sup> Hitoshi Miyasaka<sup>bc</sup> and Masaaki Ohba<sup>\*a</sup>

<sup>a</sup> *Department of Chemistry, Graduate School of Science, Kyushu University, Motooka 744, Nishi-ku, Fukuoka 819-0395, Japan. E-mail: ohba@chem.kyushu-univ.jp*

<sup>b</sup> *Institute for Materials Research, Tohoku University, 2-1-1 Katahira, Aoba-ku, Sendai 980-8577, Japan*

<sup>c</sup> *Department of Chemistry, Graduate School of Science, Tohoku University, 6-3 Aramaki-Aza-Aoba, Aoba-ku, Sendai 980-8578, Japan*

## Physical Measurement

Elemental analysis of carbon, hydrogen and nitrogen for  $[\text{Ni}^{\text{II}}(\text{dmen})_2][\text{Fe}^{\text{III}}(\text{CN})_6](\text{AQDS})_{0.5} \cdot 7\text{H}_2\text{O}$  (**1**<sub>H<sub>2</sub>O</sub>; dmen = 1,1-dimethylethylenediamine, AQDS<sup>2-</sup> = 1,5-anthraquinonedisulfonate) was carried out at the division of graduate school of science in Kyushu University. Infrared (IR) spectra were recorded with a JASCO FT/IR-4200 spectrophotometer with an ATR accessory. Thermal gravimetric analysis (TGA) was performed using a Perkin Elmer STA6000 instrument, in the temperature range of 30–700°C, under N<sub>2</sub> atmosphere (heating rate: 5°C min<sup>-1</sup>). PXRD patterns were collected on a Rigaku Ultima IV spectrometer. *In situ* PXRD measurement for dehydrated **1** was conducted under vacuum with a glass capillary connected to a homemade adsorption equipment. Adsorption and desorption isotherms were acquired using a BELSORP-MAX volumetric adsorption equipment (Microtrac BEL Corp.). The samples were dehydrated by heating at 400 K for 6 h before the measurements. The magnetic properties were investigated using a Quantum Design MPMS-XL5R SQUID. The samples were put into a gelatin capsule, placed in a plastic straw, and then fixed to the end of the sample transport rod. Diamagnetic correction was calculated by using Pascal constant.<sup>1</sup> The molar magnetic susceptibility ( $\chi_{\text{M}} = M/H$ ) were corrected for the diamagnetism of the constituent atoms and the sample tube. The temperature dependence of field cooled magnetization (FCM) curves were measured in the temperature range of 2–30 K under an applied magnetic field of 10 Oe. The field-dependence of magnetization curves were measured in the field range of -5 T to 5 T at 2 K. Temperature dependence of alternating-current (ac) magnetic susceptibilities ( $\chi'_{\text{M}}$  = in phase,  $\chi''_{\text{M}}$  = out of phase) were measured in the frequency range of 1–100 Hz under a zero dc field and an oscillating field of 3 Oe.

## Single-crystal X-ray diffraction

Single-crystal X-ray diffraction data of **1**<sub>H<sub>2</sub>O</sub> were collected on a Bruker SMART APEX II ULTRA CCD-detector Diffractometer, a rotating-anode (Bruker Turbo X-ray source) with graphite-monochromated MoK $\alpha$  radiation ( $\lambda = 0.71073 \text{ \AA}$ ) was used. Computations were carried out on APEX2 crystallographic software package and OLEX2 software.<sup>2</sup> A single crystal was mounted on a polymer film with liquid paraffin and the

temperature kept constant under flowing N<sub>2</sub> gas. The structure of **1\_H<sub>2</sub>O** was solved by a standard direct method (XSHELL V6.3.1 crystallographic software package of the Bruker AXS) and expanded Fourier techniques. Full-matrix least-squares refinements were carried out with anisotropic thermal parameters for all non-disordered and non-hydrogen atoms. All of the hydrogen atoms were placed in the measured positions and refined using a riding model. Relevant crystal data collection and refinement data for the crystal structure of **1\_H<sub>2</sub>O** are summarized in Table S1. CCDC 2063060

## Preparations

All chemicals were purchased from commercial sources and used without further purification. Precursor complex, [Ni(dmen)<sub>3</sub>]Cl<sub>2</sub> (dmen = 1,1-dimethylethylenediamine, H<sub>2</sub>NC(CH<sub>3</sub>)<sub>2</sub>CH<sub>2</sub>NH<sub>2</sub>) was prepared according to literature method.<sup>3</sup> [Ni(dmen)<sub>2</sub>]<sub>2</sub>[Fe(CN)<sub>6</sub>](AQDS)<sub>0.5</sub>·7H<sub>2</sub>O (**1\_H<sub>2</sub>O**; AQDS<sup>2-</sup> = 1,5-anthraquinonedisulfonate) was prepared by following steps.

### Single Crystals of [Ni<sup>II</sup>(dmen)<sub>2</sub>]<sub>2</sub>[Fe<sup>III</sup>(CN)<sub>6</sub>](AQDS)<sub>0.5</sub>·7H<sub>2</sub>O (**1\_H<sub>2</sub>O**)

**1\_H<sub>2</sub>O** was prepared by a liquid phase diffusion method in a straight tube. A solution of [Ni(dmen)<sub>3</sub>]Cl<sub>2</sub> (40 mg, 0.1 mmol) and Na<sub>2</sub>AQDS (10.3 mg, 0.025 mmol) in H<sub>2</sub>O (10 mL) were added to a solution of K<sub>3</sub>[Fe(CN)<sub>6</sub>] (16 mg, 0.05 mmol) in H<sub>2</sub>O (10 mL) at room temperature. The solution was allowed to stand for several weeks and the brown crystals were obtained. Yield: 72 %. Elemental analysis (%); Calcd. for C<sub>29</sub>H<sub>45</sub>N<sub>14</sub>SO<sub>9.5</sub>Ni<sub>2</sub>Fe: C 36.24, H 6.19, N 20.40; found: C 36.25, H 6.42, N 20.45.

### Powder Samples of **1**

The dehydrated powder samples of **1** were prepared by heating **1\_H<sub>2</sub>O** under vacuum at 400 K for 6 h.

### Powder Samples of **1\_MeOH**

The powder samples of methanol clathrate (**1\_MeOH**) were prepared via a vapor diffusion method. The dehydrated powder samples of **1** were placed under MeOH vapor for 3 h.

**Table S1.** Crystallographic data and refinement parameter for **1\_H<sub>2</sub>O**

| <b>1_H<sub>2</sub>O</b> CCDC 2063060 |                                                                                     |
|--------------------------------------|-------------------------------------------------------------------------------------|
| Formula                              | C <sub>29</sub> H <sub>48</sub> N <sub>14</sub> SO <sub>11</sub> Ni <sub>2</sub> Fe |
| Temperature / K                      | 100                                                                                 |
| Crystal system                       | Monoclinic                                                                          |
| Space group                          | <i>P</i> 2 <sub>1</sub> / <i>n</i>                                                  |
| <i>a</i> / Å                         | 14.205(2)                                                                           |
| <i>b</i> / Å                         | 21.812(2)                                                                           |
| <i>c</i> / Å                         | 14.694(2)                                                                           |
| <i>α</i> / °                         | 90                                                                                  |
| <i>β</i> / °                         | 90.464(1)                                                                           |
| <i>γ</i> / °                         | 90                                                                                  |
| <i>V</i> / Å <sup>3</sup>            | 4552.7(8)                                                                           |
| <i>Z</i>                             | 4                                                                                   |
| <i>GOF</i>                           | 1.046                                                                               |
| <i>R</i> <sub>1</sub>                | 4.57                                                                                |
| <i>wR</i> <sub>2</sub>               | 13.2                                                                                |

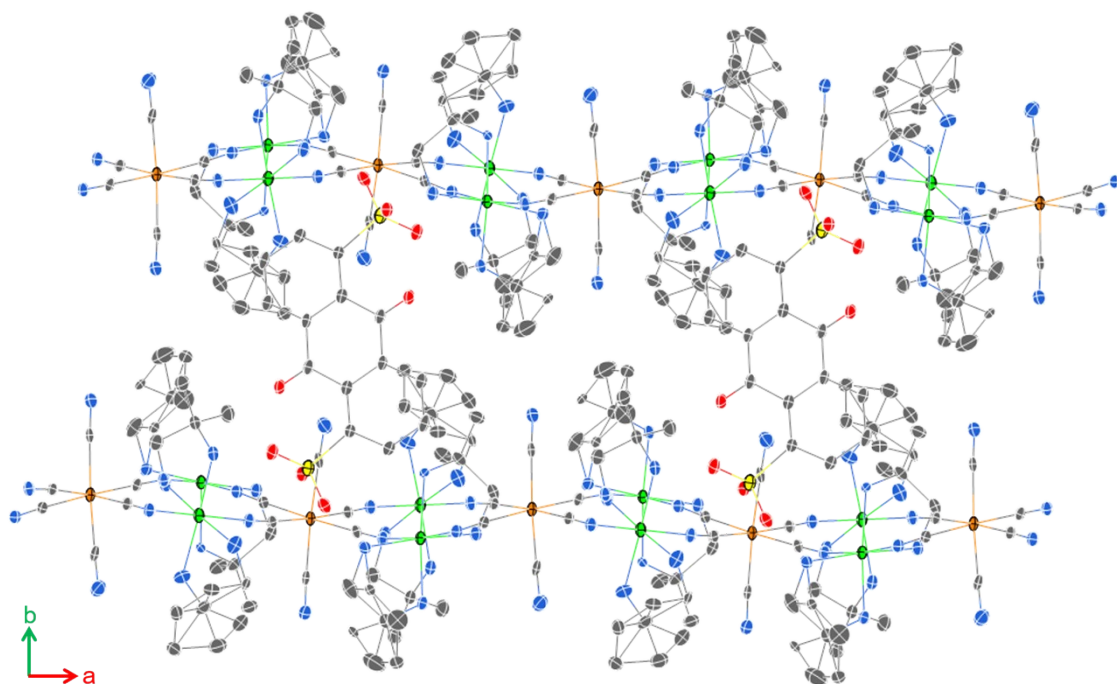

**Fig. S1** An ORTEP drawing of the crystal structure for **1\_H<sub>2</sub>O** from a view along c-axis. Atomic code: Fe, orange; Ni, green; C, grey; N, blue; O, red; S, yellow, respectively. Lattice solvents and H atoms are omitted for clarity. Thermal ellipsoids are shown at the 50% probability level.

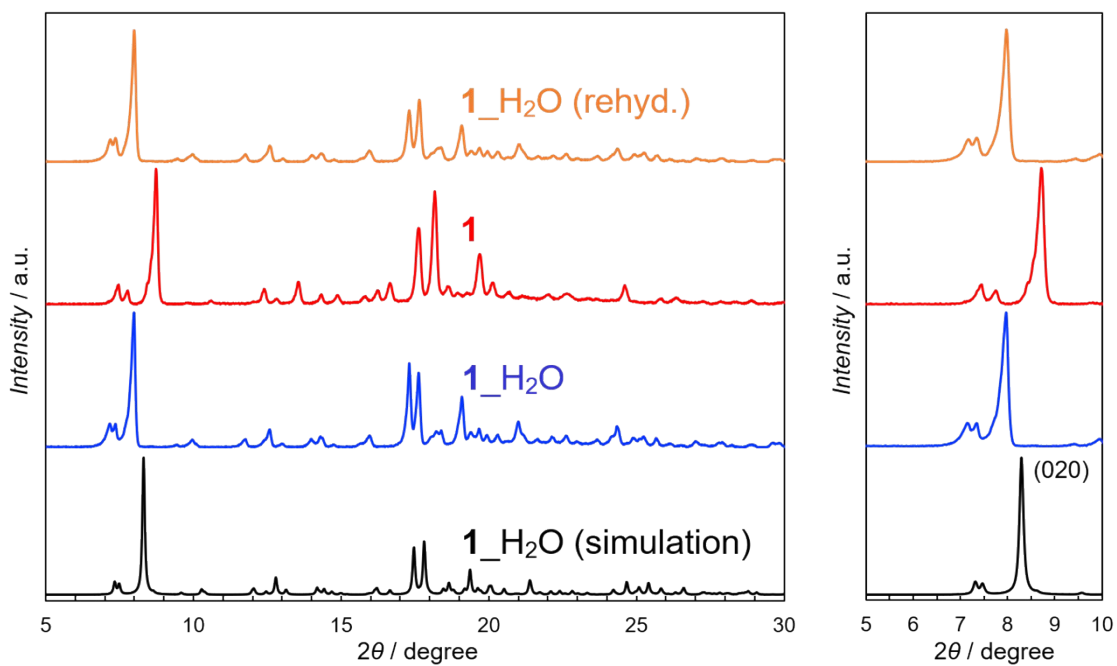

**Fig. S2** PXRD patterns of **1\_H<sub>2</sub>O** (blue), **1** (red), **1\_H<sub>2</sub>O** (rehyd.) (orange) and simulated pattern of **1\_H<sub>2</sub>O** (black)

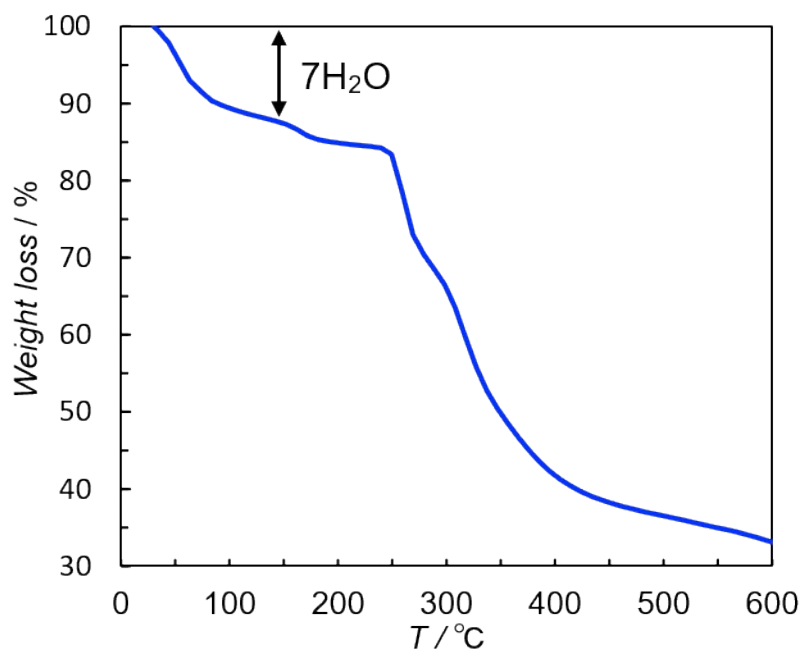

**Fig. S3** TGA curve of **1\_H<sub>2</sub>O**

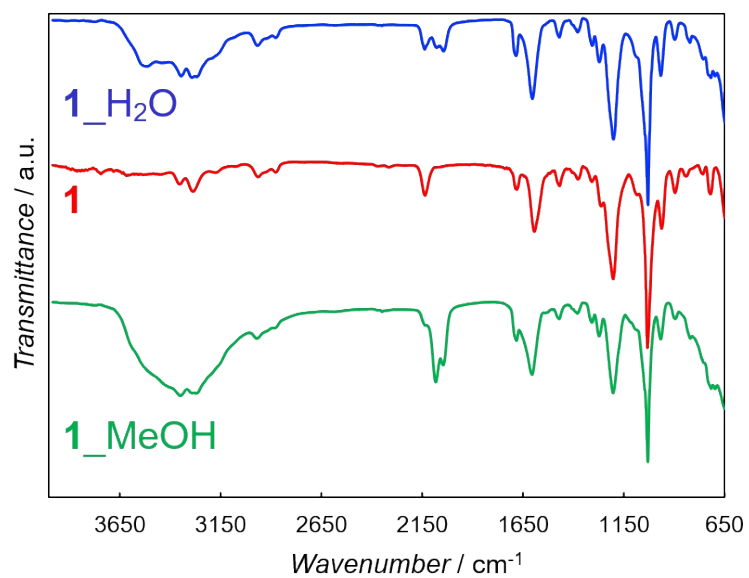

**Fig. S4** IR spectra of (a) **1\_H<sub>2</sub>O** (blue), **1** (red), **1\_MeOH** (green)

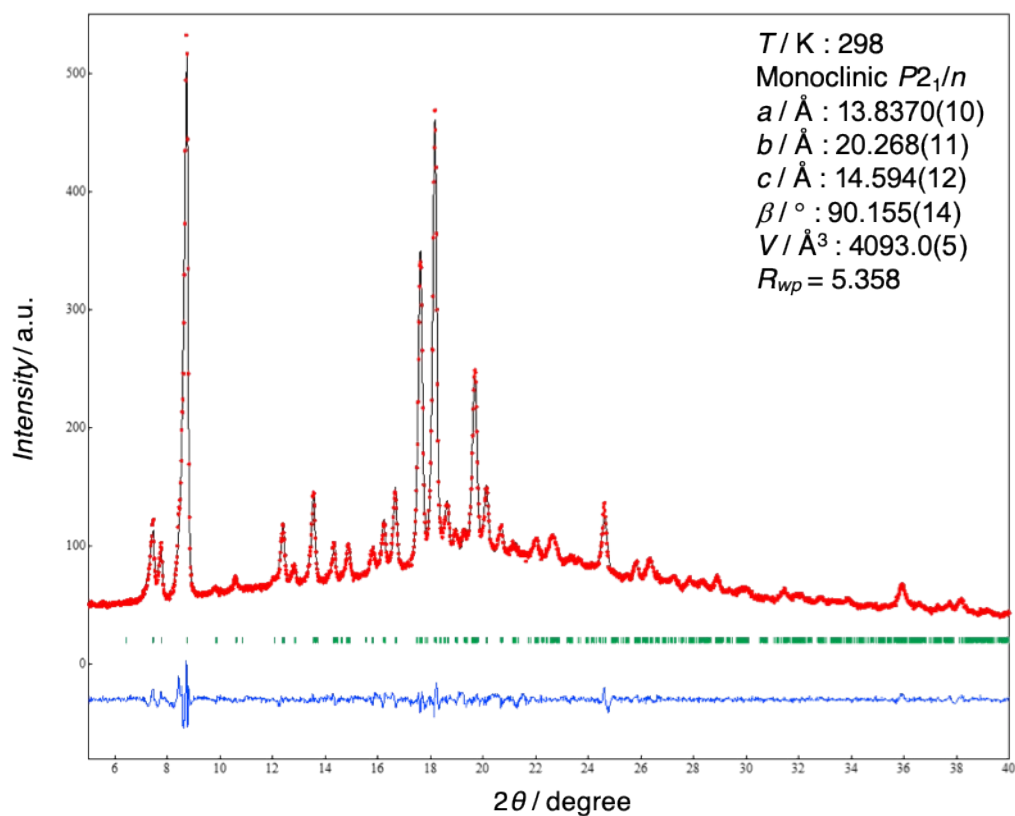

**Fig. S5** Le Bail analysis of **1** under vacuum at 298 K with the results of PXRD pattern ( $\lambda = 1.5418 \text{ \AA}$ ). Red dots, black line, and blue line represent the observed plots, calculated pattern, and their difference, respectively. Green bars are the calculated positions of the Bragg reflections.

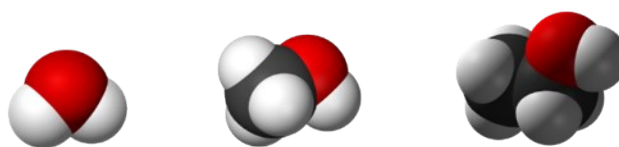

|                      | H <sub>2</sub> O | MeOH  | EtOH  |
|----------------------|------------------|-------|-------|
| Kinetic diameter (Å) | 2.641            | 3.626 | 4.530 |

**Fig. S6** Kinetic diameter of H<sub>2</sub>O, MeOH and EtOH<sup>4</sup>

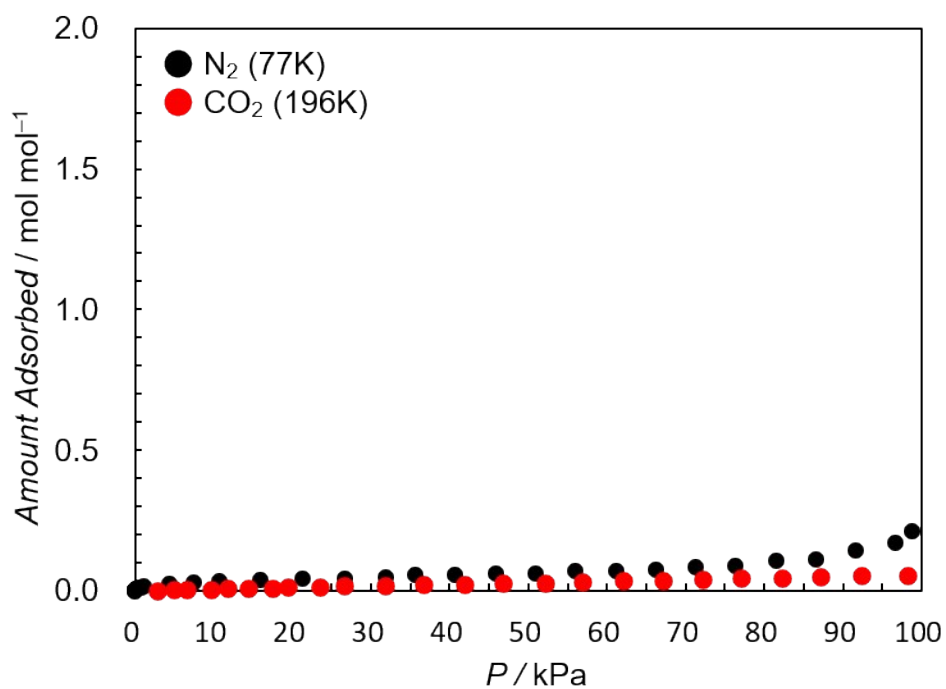

**Fig. S7** Adsorption isotherms of **1** for N<sub>2</sub> (black) and CO<sub>2</sub> (red). The filled circles display the adsorption process.

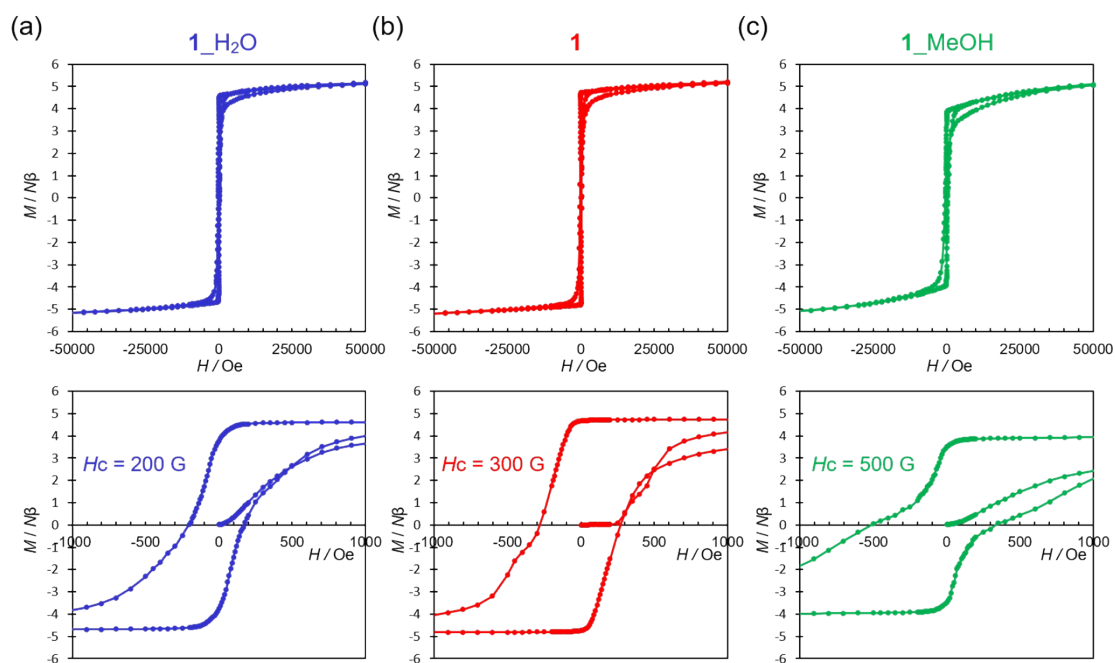

**Fig. S8** Magnetic hysteresis curves of for (a) **1**<sub>H<sub>2</sub>O</sub> (blue), (b) **1** (red) and (c) **1**<sub>MeOH</sub> (green) at 2 K.



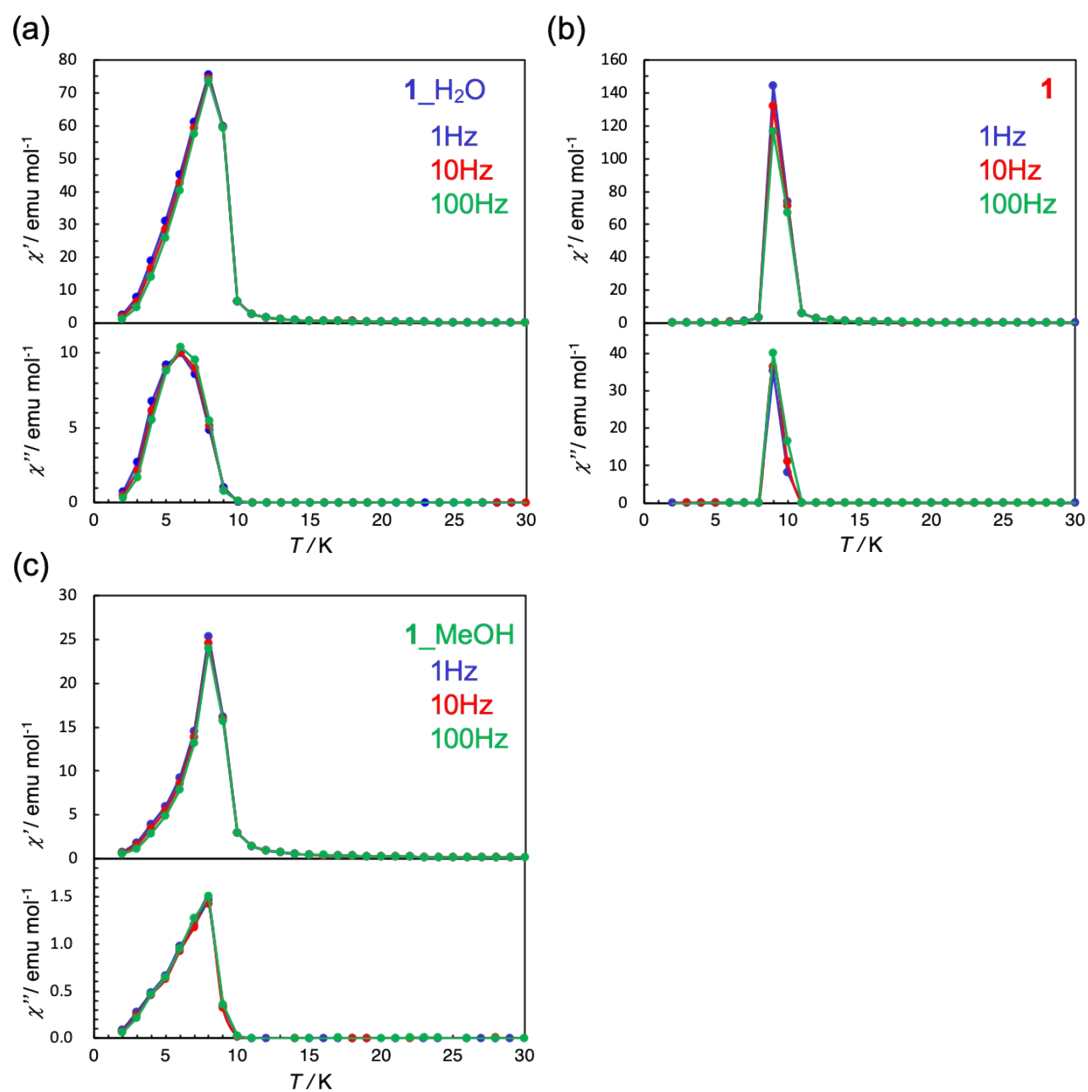

**Fig. S9** Temperature dependence of  $\chi'_M$  vs.  $T$  and  $\chi''_M$  vs.  $T$  plots for (a) **1\_H<sub>2</sub>O**, (b) **1** and (c) **1\_MeOH** measured in the frequency range of 1–100 Hz under a zero dc field and an oscillating field of 3 Oe (temperature range: 2–30 K).

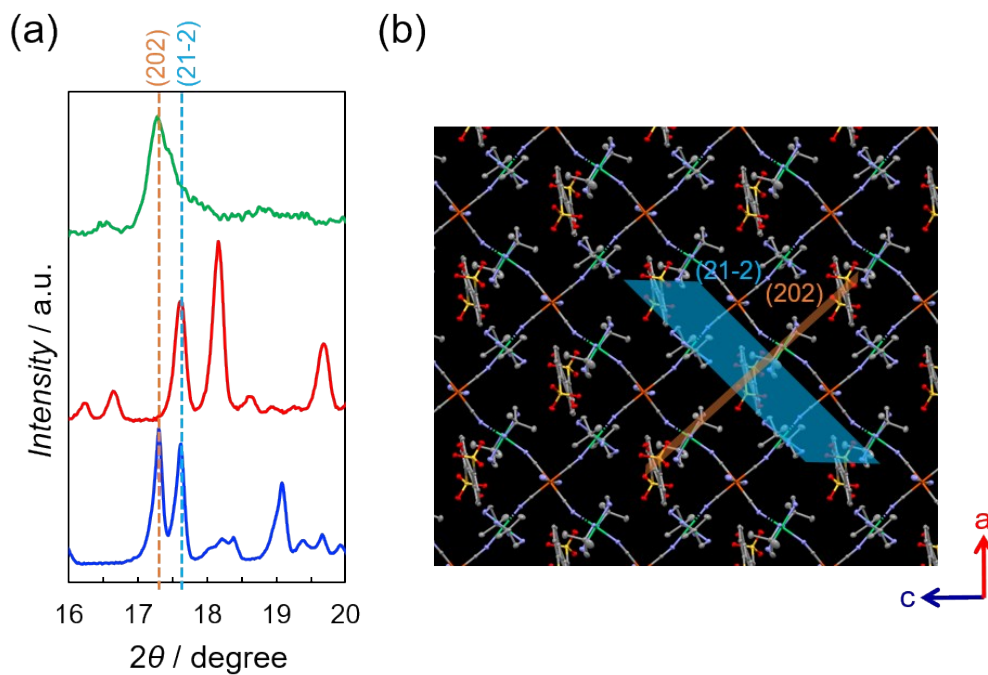

**Fig. S10** (a) PXR D patterns of **1\_H<sub>2</sub>O** (blue), **1** (red) and **1\_MeOH** (green). (b) Lattice plane of (202) and (21-2)

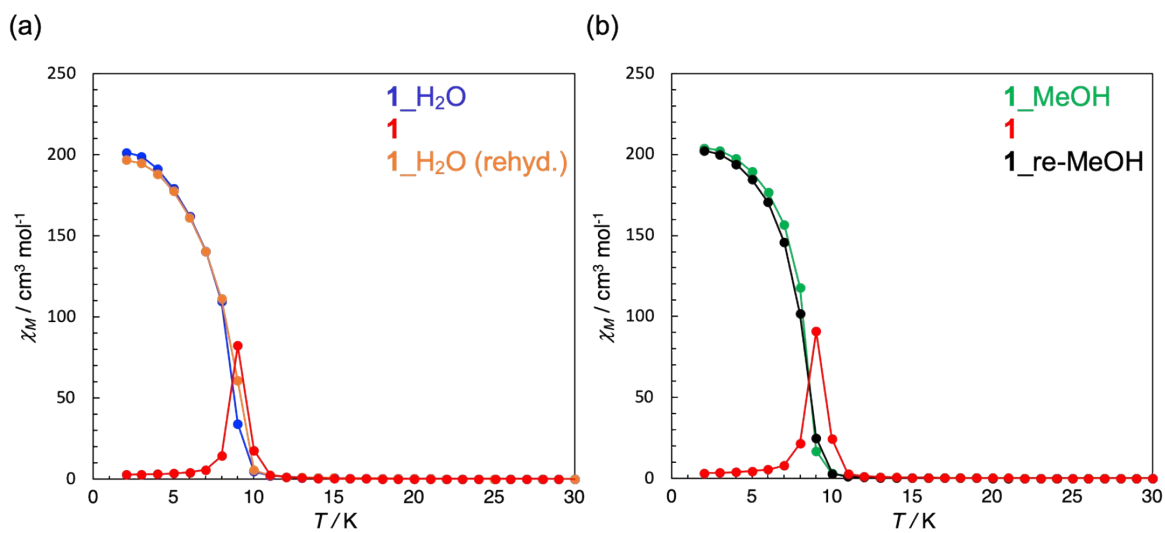

**Fig. S11** Temperature dependence of  $\chi_M$  vs  $T$  plots for (a) **1\_H<sub>2</sub>O** (blue), **1** (red), **1\_H<sub>2</sub>O** (rehyd.) (orange) and (b) **1\_MeOH** (green), **1** (red), **1\_re-MeOH** (black) under an applied magnetic field of 10 Oe.

## Reference

- 1 Boudreaux, E. A. & Mulay, L. N. *Theory and Applications of Molecular Paramagnetism*. (John Wiley & Sons, New York, 1976).
- 2 O. V. Dolomanov, L. J. Bourhis, R. J. Gildea, J. a. K. Howard and H. Puschmann, *J. Appl. Crystallogr.*, 2009, **42**, 339–341.
- 3 M. Ohba and H. Ōkawa, *Coord. Chem. Rev.*, 2000, 198, 313–328.
- 4 J. R. Li, R. J. Kuppler and H. C. Zhou, *Chem. Soc. Rev.*, 2009, **38**, 1477–1504.
